# Supplementary material for: Skimming for barcodes: rapid production of mitochondrial genome and nuclear ribosomal repeat reference markers through shallow shotgun sequencing
Source: PeerJ journal article supplement (doi:10.7717/peerj.13790), 2022-08-05
Supplement: Supplemental_Figure_S2.pdf [file Supplemental_Figure_S2.pdf]

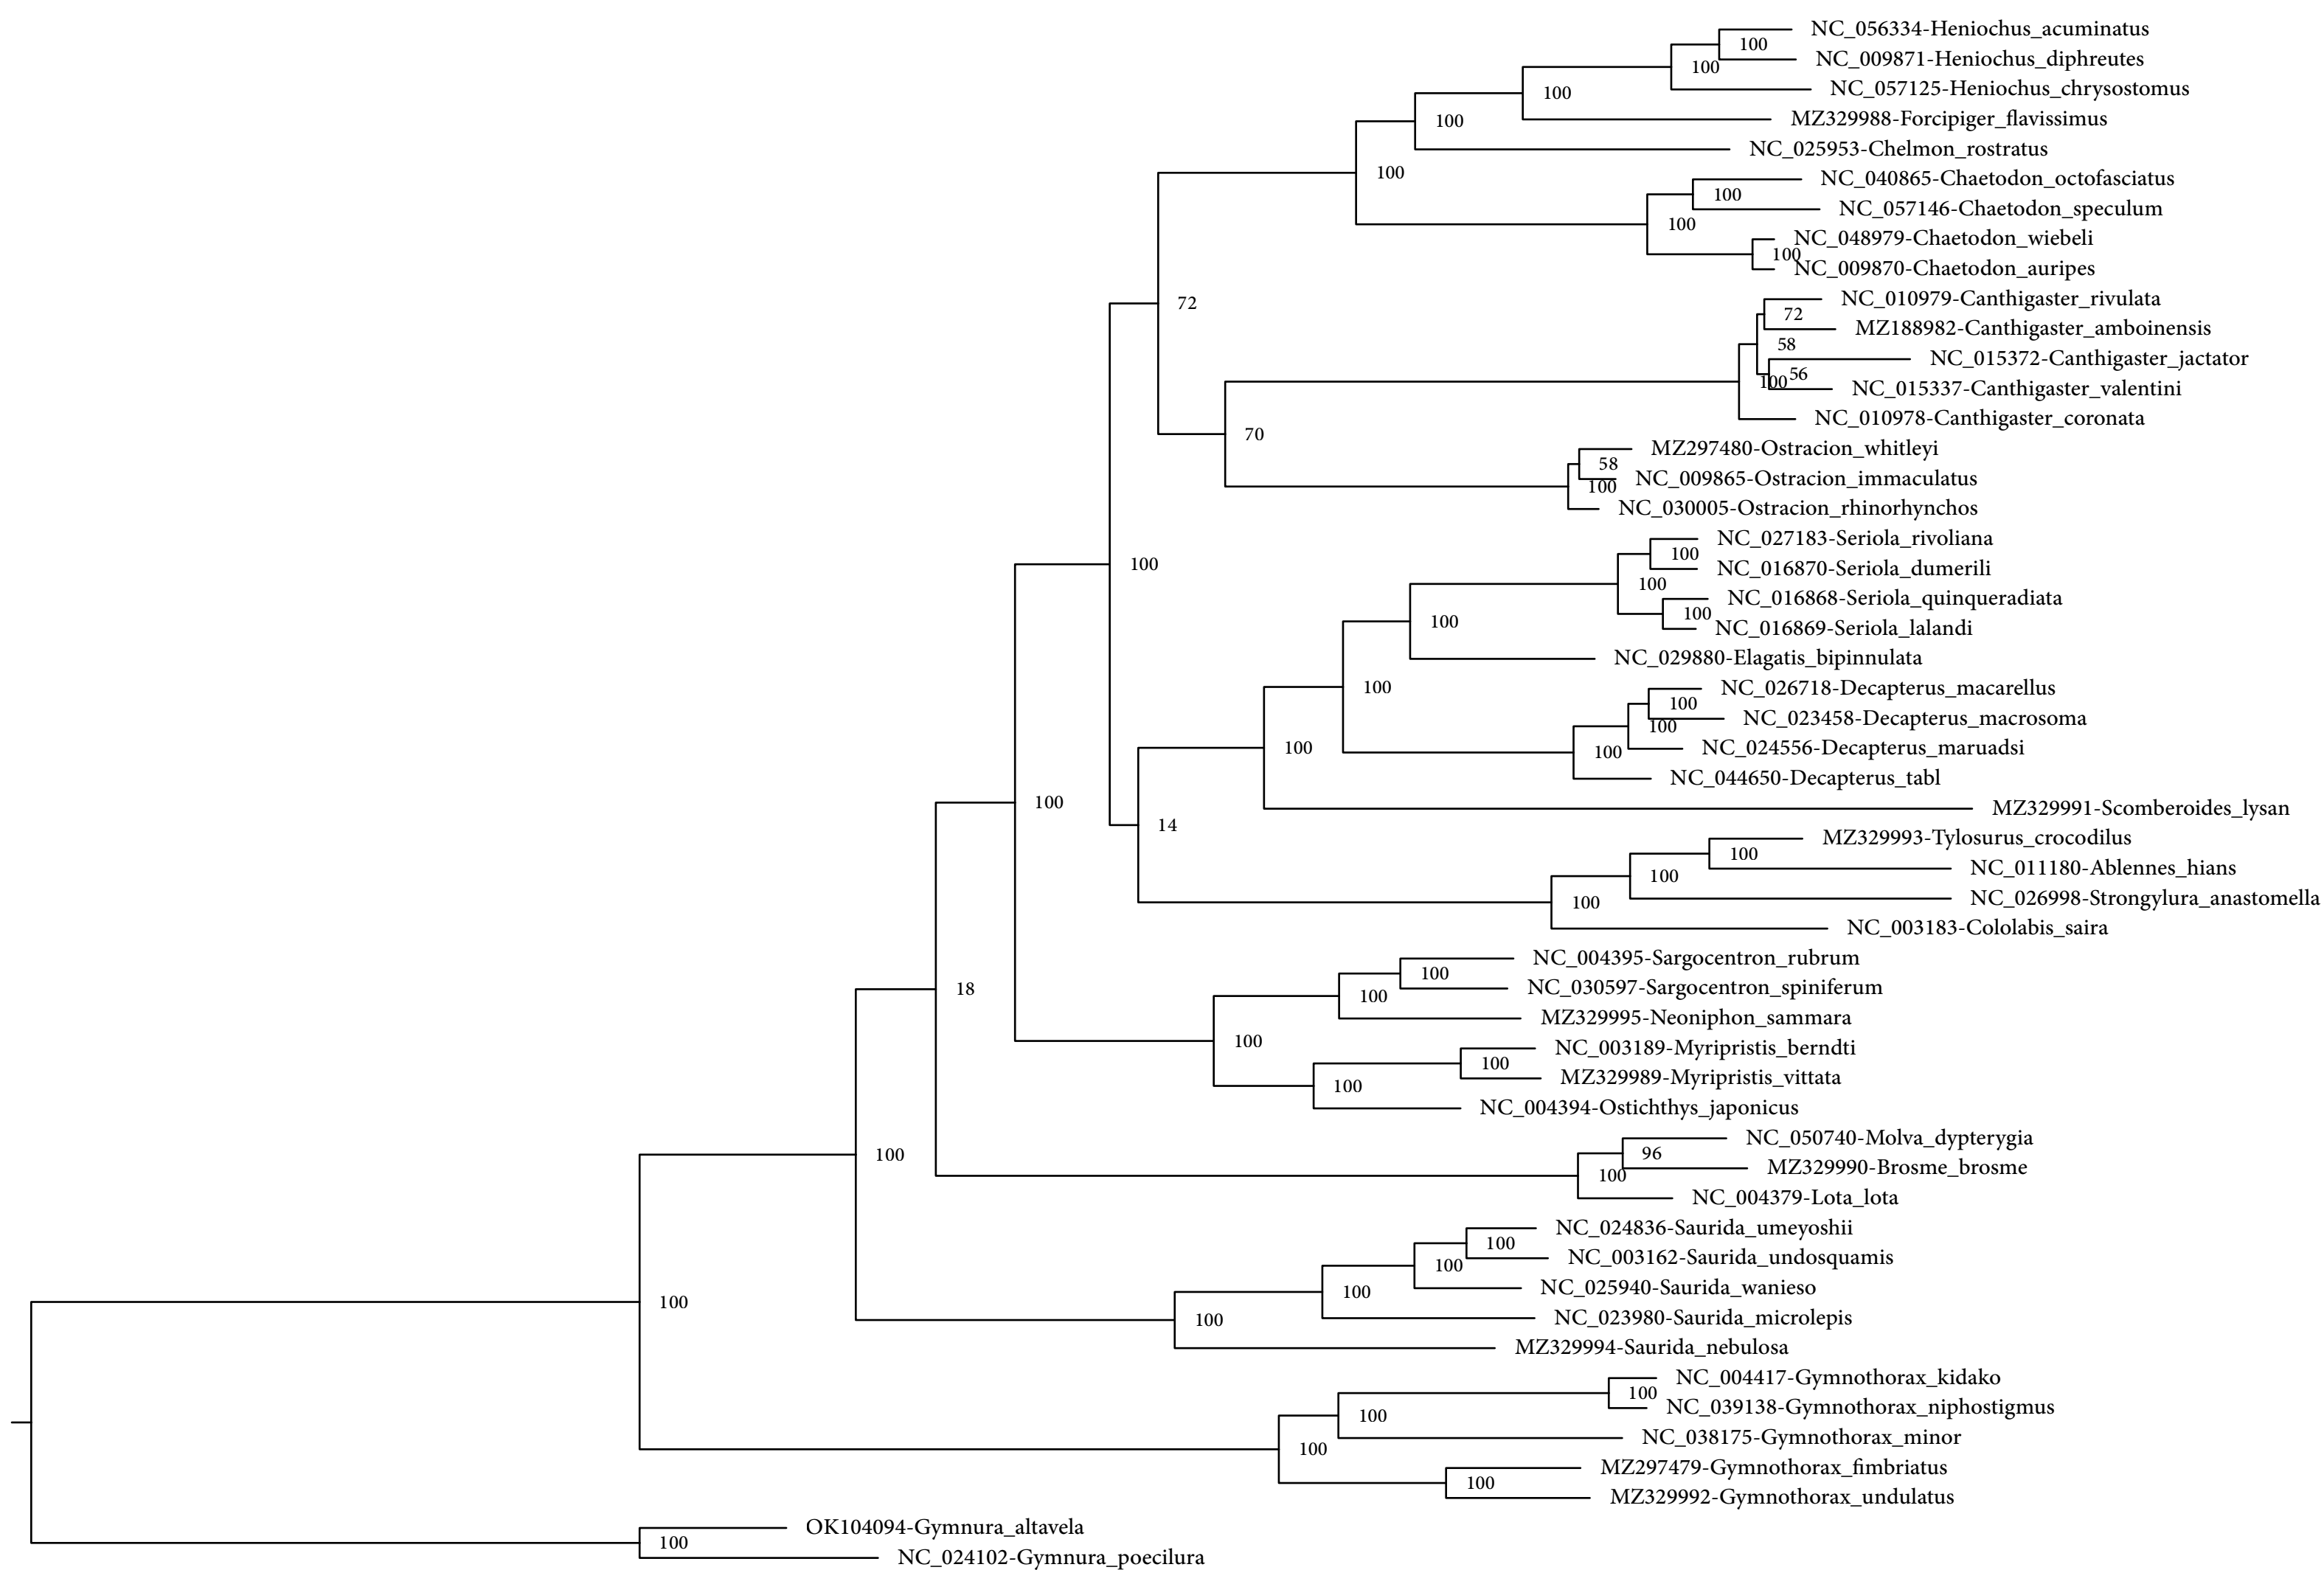

0.6
