# Supplementary material for: Skimming for barcodes: rapid production of mitochondrial genome and nuclear ribosomal repeat reference markers through shallow shotgun sequencing
Source: PeerJ. 2022 Aug 5;10:e13790. doi: 10.7717/peerj.13790 (PMC9359134; doi:10.7717/peerj.13790)
Supplement: Table S3 [file peerj-10-13790-s003.xlsx]

## Sheet: Sheet1
Library Prep & QC Options	Total	Per library
enzymatic fragmentation	378.75	31.5625
mechanical (Covaris) fragmentation	451.5	37.625
Sequencing Opton	Total	Per library
MiSeq Sequencing	3496	145.667
Total Cost (Library, QC, & Sequencing)	Total	Per Library
enzymatic fragmentation	3874.75	161.448
mechanical fragmentation	3947.5	164.479
