# Supplementary material for: Skimming for barcodes: rapid production of mitochondrial genome and nuclear ribosomal repeat reference markers through shallow shotgun sequencing
Source: PeerJ. 2022 Aug 5;10:e13790. doi: 10.7717/peerj.13790 (PMC9359134; doi:10.7717/peerj.13790)
Supplement: Table S4 [file peerj-10-13790-s004.xlsx]

## Sheet: Sheet1
Library Prep & QC Options	Total	Per library
enzymatic fragmentation	7456	19.4167
enzymatic frag. with reduced tapestation	5944	15.4792
mechanical fragmentation*	9162	23.8594
Sequencing Optons	Total	Per library
NovaSeq S4	6100	15.8854
Total Cost (Library, QC, & Sequencing)	Total	Per library
enzymatic fragmentation	13556	35.3021
enzymatic frag. with reduced tapestation*	12044	31.3646
mechanical fragmentation	15262	39.7448
		`
* Rather than run all individual libraries on the TapeStation, this reduced option only runs the tapestation on pools of 96 libraries (one per plate), plus the final pool of 384
