# Supplementary material for: Skimming for barcodes: rapid production of mitochondrial genome and nuclear ribosomal repeat reference markers through shallow shotgun sequencing
Source: PeerJ. 2022 Aug 5;10:e13790. doi: 10.7717/peerj.13790 (PMC9359134; doi:10.7717/peerj.13790)
Supplement: Table S5 [file peerj-10-13790-s005.xlsx]

## Sheet: Sheet1
Species	GenBank Accession	Generated in this study
Gymnothorax kidako	NC_004417	0
Gymnothorax minor	NC_038175	0
Gymnothorax niphostigmus	NC_039138	0
Saurida microlepis	NC_023980	0
Saurida umeyoshii	NC_024836	0
Saurida undosquamis	NC_003162	0
Saurida wanieso	NC_025940	0
Ablennes hians	NC_011180	0
Cololabis saira	NC_003183	0
Strongylura anastomella	NC_026998	0
Decapterus macarellus	NC_026718	0
Decapterus macrosoma	NC_023458	0
Decapterus maruadsi	NC_024556	0
Decapterus tabl	NC_044650	0
Elagatis bipinnulata	NC_029880	0
Seriola dumerili	NC_016870	0
Seriola lalandi	NC_016869	0
Seriola quinqueradiata	NC_016868	0
Seriola rivoliana	NC_027183	0
Chaetodon auripes	NC_009870	0
Chaetodon octofasciatus	NC_040865	0
Chaetodon speculum	NC_057146	0
Chaetodon wiebeli	NC_048979	0
Chelmon rostratus	NC_025953	0
Heniochus acuminatus	NC_056334	0
Heniochus chrysostomus	NC_057125	0
Heniochus diphreutes	NC_009871	0
Lota lota	NC_004379	0
Molva dypterygia	NC_050740	0
Myripristis berndti	NC_003189	0
Ostichthys japonicus	NC_004394	0
Sargocentron rubrum	NC_004395	0
Sargocentron spiniferum	NC_030597	0
Gymnura poecilura	NC_024102	0
Ostracion immaculatus	NC_009865	0
Ostracion rhinorhynchos	NC_030005	0
Canthigaster coronata	NC_010978	0
Canthigaster jactator	NC_015372	0
Canthigaster rivulata	NC_010979	0
Canthigaster valentini	NC_015337	0
Gymnura altavela	OK104094	1
Gymnothorax fimbriatus	MZ297479	1
Gymnothorax undulatus	MZ329992	1
Saurida nebulosa	MZ329994	1
Tylosurus crocodilus	MZ329993	1
Myripristis vittata	MZ329989	1
Neoniphon sammara	MZ329995	1
Brosme brosme	MZ329990	1
Scomberoides lysan	MZ329991	1
Forcipiger flavissimus	MZ329988	1
Ostracion whitleyi	MZ297480	1
Canthigaster amboinensis	MZ188982	1
